# Supplementary material
Source: publisher figshare collection journal article supplement (https://gsapubs.figshare.com/ndownloader/files/22408470)
Supplement: Supplementary file 1 [file 22408470]

## Sheet: Appendices
Supplemental File 1: Electron microprobe data collected for this project. Both amphibole (AM) and pyroxene (PX) data are presented.
		OU data analyzed by Nolwenn Coint					OU data analyzed by Samantha Buck
		UW data analyzed by Susan Swapp
	PX	Pyroxene		AM	Amphibole
Sample	SiO2	TiO2	Al2O3	FeO*	MnO	MgO	CaO	Na2O	K2O	Cr2O3	F	O=F	Total
Central zone
7109Hbl2core	46.1498	1.56433	8.25505	17.4631	0.43145	10.9314	11.1383	1.2197	0.674625				97.8277
7109Hbl2rim	46.4775	0.8894	8.08493	17.4841	0.402133	11.1166	11.6314	0.942767	0.720633				97.7496
7109Hbl4core	43.6442	1.9159	9.8635	18.3644	0.3992	9.90707	11.1739	1.3497	0.995067				97.613
7109Hbl4rim	45.3979	1.1183	8.76125	17.8397	0.4412	10.6761	11.2858	1.19705	0.7373				97.4547
7109Px1	53.2197	0.2744	2.73655	14.1193	0.3847	14.9977	12.1217	0.30065	0.16645				98.3211
7109Hbl1core	45.0595	1.76425	9.19127	18.0981	0.41675	10.486	10.9958	1.37688	0.8945				98.283
7109Hbl1rim	46.5818	0.879733	8.3171	17.2198	0.410533	11.1975	11.4002	1.0034	0.683467				97.6936
7109Hbl9core	45.2187	1.88118	8.85368	17.5488	0.42	10.8236	11.1592	1.3156	0.81605				98.0368
7109Hbl9rim	46.7284	0.792767	7.97027	17.4625	0.4351	11.3643	11.6166	0.976133	0.644933				97.9909
7109Px5	53.5772	0.212433	2.15483	14.2274	0.529433	15.2337	11.6606	0.316567	0.136733				98.0489
7109Hbl5core	44.403	1.91097	9.15025	18.1604	0.435975	10.2039	11.3889	1.22965	0.920125				97.8032
7109Hbl5rim	45.5897	1.2774	8.7631	17.9808	0.444833	10.649	11.2843	1.12577	0.7369				97.8518
7109Hbl5	45.7	1.02566	8.77892	17.9348	0.41404	10.7142	11.5856	1.05772	0.74162				97.9526
7109 av	45.5409	1.36544	8.7263	17.7779	0.422838	10.7336	11.3327	1.16312	0.778656				97.8415
6209Hbl4core	43.7422	2.44715	9.83438	18.1334	0.358925	10.0825	10.9584	1.44988	1.0059				98.0127
6209Hbl4rim	46.3895	1.0011	8.40628	17.5552	0.4028	11.1216	11.1821	1.14902	0.618				97.8256
6209Hbl10	44.8224	1.8944	9.2486	18.1008	0.358925	10.5136	11.0759	1.36532	0.7864				98.1664
6209Act1	53.2984	0.316067	2.71793	13.0412	0.341733	15.5043	11.8435	0.363333	0.163367				97.5898
6209 av	44.9847	1.78088	9.16308	17.9298	0.37355	10.5726	11.0721	1.32141	0.803433				98.0016
4809Hbl3core	45.1687	1.41302	9.39948	17.1746	0.3712	11.0178	10.9629	1.16392	0.570525				97.2421
4809Hbl4core	45.7287	2.05643	9.0215	16.8155	0.319167	11.5013	10.8554	1.27117	0.676767				98.246
4809Hbl4rim	46.2691	1.4837	8.99023	16.7892	0.355767	11.6872	10.9041	1.17577	0.545533				98.2006
4809Hbl6	46.3117	1.42653	9.3151	17.164	0.331767	11.4485	11.1503	1.13117	0.585267				98.8643
4809Hbl1core	46.1155	1.78357	8.7874	16.9624	0.3436	11.5841	10.8047	1.205	0.5883				98.1746
4809Hbl1rim	46.1668	1.19777	9.00753	16.7415	0.331533	11.4796	11.2324	1.02077	0.5346				97.7125
4809 av	45.9601	1.56017	9.08687	16.9412	0.342172	11.4531	10.985	1.1613	0.583499				98.0733
4909Hbl4core	45.4374	1.80713	9.2521	16.9936	0.308333	11.5321	10.6782	1.25517	0.6811				97.9452
4909Hbl4rim	46.9663	1.1529	8.82847	16.4514	0.339367	11.7796	11.1954	1.03377	0.478633				98.2259
4909Hbl7core	46.4592	1.34363	8.72567	16.9177	0.348	11.5578	11.0139	1.08583	0.495567				97.9473
4909Hbl8core	46.1891	1.9699	8.4831	16.9333	0.35045	11.7649	10.6022	1.12525	0.60075				98.019
4909Hbl8rim	46.2341	1.26045	8.85715	17.2375	0.3908	11.4839	10.5114	1.0858	0.5324				97.5935
4909 av	46.2572	1.5068	8.8293	16.9067	0.34739	11.6237	10.8002	1.11716	0.55769				97.9462
5709bHbl6core	47.6449	1.3541	8.0955	15.6173	0.343733	12.9105	10.8735	1.04627	0.454367				98.3403
5709bHbl6crim	48.9628	0.6846	7.64115	14.4823	0.28455	13.4508	11.6248	0.87685	0.32265				98.3305
5709bHbl1core	47.4744	1.68357	7.84007	15.2432	0.3176	13.064	10.8873	0.952867	0.514967				97.978
5709bHbl1rim	48.5733	0.7775	7.529	15.1135	0.332367	13.4281	11.0918	0.936767	0.358933				98.1413
5709bHbl2core	48.3717	1.09793	7.44963	15.1911	0.329167	13.5685	10.4337	0.9919	0.362467				97.7962
5709bHbl2rim	48.3875	0.9968	7.8068	14.7751	0.319033	13.1496	11.2896	0.905533	0.376867				98.0067
5709b av	48.2358	1.09908	7.72703	15.0704	0.321075	13.2619	11.0335	0.951697	0.398375				98.0988
6309Hbl1core	44.2963	2.08195	9.38092	18.4223	0.427525	10.0723	10.8425	1.4417	0.8701				97.8356
6309Hbl1rim	46.3706	0.823167	8.31927	18.0461	0.440667	10.6886	11.4197	1.04223	0.658133				97.8085
6309Hbl3core	44.6001	1.99787	9.31997	17.9681	0.369167	10.5471	10.7806	1.41557	0.841333				97.8398
6309Hbl3rim	46.7205	0.729775	8.0577	17.8158	0.400925	11.0043	11.643	0.895875	0.712575				97.9804
6309Hbl8core	44.1283	2.13853	9.51497	18.299	0.426675	10.0045	10.9766	1.42405	0.877375				97.7899
6309Hbl8rim	46.116	0.7537	8.54083	17.8032	0.4027	10.5844	11.6055	0.976133	0.719367				97.5018
6309 av	45.372	1.42083	8.85561	18.0591	0.411276	10.4835	11.2113	1.19926	0.779814				97.7927
Label	SiO2	TiO2	Al2O3	FeO*	MnO	MgO	CaO	Na2O	K2O		F	O=F	Total
Lower zone
WCB128aAM14	49.051	1.4633	6.7581	13.5624	0.3295	13.9254	11.3142	0.7848	0.4093		0.4971	-0.209305	97.8858
WCB128aAM13	53.4182	0.4767	3.0439	12.1818	0.2742	16.439	11.5578	0.3185	0.1202		0.28	-0.117895	97.9924
WCB128aAM55	49.2265	1.4836	6.4282	13.2043	0.2447	14.52	11.025	0.8417	0.4796		0.1152	-0.0485053	97.5203
WCB128aAM42	49.3682	1.3894	6.7808	13.1554	0.2325	14.5655	11.0577	0.8663	0.4422		0.0001	-4.21053e-05	97.8581
WCB128aPx53	48.5732	1.7534	6.8451	12.3049	0.1794	14.7513	11.2476	1.003	0.5529		0.5674	-0.238905	97.5393
WCB128aPx12	53.2864	0.2202	1.2526	9.0929	0.3441	14.2291	20.9141	0.2154	0.0196		0.5168	-0.2176	99.8736
WCB128aPx11	53.2564	0.2866	1.5487	6.9336	0.2337	15.1099	23.1109	0.1352	0		0.56	-0.235789	100.939
WCB128aPx21	52.5321	0.5895	3.554	9.4877	0.2258	15.4802	16.1816	0.4199	0.1764		0.3428	-0.144337	98.8457
WCB128aPx22	53.5097	0.1456	0.9952	8.3554	0.2684	14.4733	22.8269	0.1918	0.0006		0.471	-0.198316	101.04
WCB128aPx51	52.2219	0.5014	3.2909	8.985	0.2235	15.4124	17.5894	0.4575	0.1481		0.153	-0.0644211	98.9187
WCB128aPx52	52.9563	0.2834	1.7332	8.5016	0.2731	14.5526	21.0041	0.2841	0.0471		0.0626	-0.0263579	99.6717
WCB128aPx41	52.7339	0.365	2.1496	7.6796	0.2384	15.0181	20.9978	0.2791	0.0242		0.0001	-4.21053e-05	99.4858
WCB133PX11	54.2381	0.1086	1.3157	3.8648	0.1206	17.6821	22.0449	0.2332	0		0.1399	-0.0589053	99.689
WCB133PX12	51.5663	0.4609	3.3283	7.4161	0.1821	15.6549	20.68	0.3403	0		0.3959	-0.166695	99.8581
WCB133PX13	52.2437	0.3429	2.2839	8.0276	0.2076	14.327	22.5431	0.2982	0.0022		0.1157	-0.0487158	100.343
WCB133PX21	52.5724	0.2088	0.9665	23.9153	0.5294	21.4094	1.0971	0.0302	0		0.2319	-0.0976421	100.863
WCB133PX41	53.7483	0.1504	1.1138	4.9441	0.1403	18.0535	21.4865	0.1507	0.0006		0.2447	-0.103032	99.9299
WCB133PX42	51.5146	0.2783	2.6306	10.5496	0.2409	14.808	19.5443	0.2879	0.0061		0.1017	-0.0428211	99.9192
WCB133PX43	52.4674	0.2778	2.5326	11.4431	0.2593	16.4194	17.3733	0.1971	0.0026		0.2095	-0.0882105	101.094
WCB133PX61	54.0662	0.1026	1.2969	4.6027	0.1315	17.4884	22.3436	0.2299	0.0012		0.4274	-0.179958	100.51
WCB133PX62	51.6294	0.3645	3.318	8.4692	0.2271	14.9475	20.8907	0.324	0.0112		0.1765	-0.0743158	100.284
WCB133PX63	52.54	0.3485	2.3124	6.5288	0.2004	15.2393	22.7854	0.2419	0.0035		0.4764	-0.200589	100.476
WCB133AM14	44.6917	1.9191	9.7076	13.8928	0.1019	12.7528	11.6629	1.2741	1.1107		0.3529	-0.148589	97.3179
WCB133AM44	44.5026	2.2717	10.0381	14.05	0.1505	12.4274	11.5629	1.281	1.1764		0.182	-0.0766316	97.566
MMB833A-AM63	50.9743	0.9309	5.7053	8.8961	0.1173	17.6272	12.0616	0.7678	0.3931		0.5218	-0.219705	97.7757
MMB833A-AM46	52.0741	0.601	4.8031	8.8167	0.1616	18.2861	11.6112	0.6298	0.2848		0.1086	-0.0457263	97.3313
MMB833A-PX11	51.6507	0.7899	5.1094	9.5956	0.1749	17.4692	11.8185	0.6334	0.3011		0.1771	-0.0745684	97.6452
MMB833A-AM34	51.1073	0.9274	5.8292	9.1904	0.125	17.36	11.792	0.779	0.364		0.511	-0.215158	97.7701
MMB833A-AM52	50.0003	1.5661	6.7168	9.2893	0.133	17.1623	11.7872	0.9297	0.4677		0.2567	-0.108084	98.201
MMB833A-AM53	46.7361	2.4391	9.2325	10.0855	0.1454	15.3596	11.7234	1.2262	0.7573		0.2168	-0.0912842	97.8306
MMB833A-PX61	54.0818	0.0843	0.8828	20.6626	0.5168	24.4962	0.6957	0.0185	0.002		0.0254	-0.0106947	101.455
MMB833A-PX62	53.7103	0.1716	0.9629	6.8628	0.2423	15.5479	22.6266	0.1958	0		0.0001	-4.21053e-05	100.32
MMB833A-PX43	53.3573	0.2592	1.2607	7.3299	0.2611	15.5469	22.0095	0.2035	0		0.284	-0.119579	100.393
MMB833A-PX44	53.6402	0.0795	1.3779	19.9563	0.4551	24.6834	0.5417	0	0		0.1694	-0.0713263	100.832
MMB833A-PX47	54.1783	0.049	0.8024	20.2719	0.4991	24.5345	0.5183	0.0018	0		0.2534	-0.106695	101.002
MMB833A-PX12	53.2668	0.2018	1.1185	7.1978	0.2762	14.9225	22.9879	0.1767	0		0.0743	-0.0312842	100.191
MMB833A-PX21	54.0765	0.1955	1.5604	18.774	0.4555	25.2958	0.8252	0.0089	0		0.0943	-0.0397053	101.246
MMB833A-PX31	54.3701	0.1284	1.2098	17.348	0.381	26.4847	1.0107	0.0158	0.0033		0.0001	-4.21053e-05	100.952
MMB833A-PX32	54.0014	0.1247	1.1007	19.081	0.4566	25.4586	0.4639	0.0192	0		0.3654	-0.153853	100.918
MMB833A-PX33	53.2798	0.181	1.1739	6.4718	0.192	15.413	22.9556	0.1323	0		0.0533	-0.0224421	99.8303
MMB833A-PX51	54.2261	0.0854	1.1214	19.6365	0.4731	24.9088	0.4423	0	0.0016		0.263	-0.110737	101.047
Pyroxene-rich blok
WCB132AM83	52.0195	0.6322	5.2455	7.6232	0.1039	18.825	11.7815	0.798	0.4059		0.1294	-0.0544842	97.5096
WCB132AM53	51.0913	0.9072	6.4157	7.9076	0.0999	18.0894	11.7223	0.927	0.4571		0.4753	-0.200126	97.8927
WCB132AM94	50.8117	0.8842	6.4516	7.9505	0.0971	18.1923	11.7958	0.9753	0.4895		0.2382	-0.100295	97.7859
WCB132AM33	51.2536	0.9955	6.7131	7.6894	0.109	18.273	11.7215	0.9811	0.5295		0.1196	-0.0503579	98.3349
WCB132AM34	50.5038	0.8758	7.0887	7.7707	0.0838	17.9144	11.7219	1.0547	0.5813		0.0001	-4.21053e-05	97.5952
WCB132AM35	51.3426	0.8556	5.9458	7.6745	0.0829	18.4097	11.7407	0.9092	0.4764		0.0299	-0.0125895	97.4547
WCB132AM23	50.698	0.9489	6.917	8.0674	0.0905	17.792	11.8923	0.9495	0.534		0.1094	-0.0460632	97.9529
WCB132AM24	49.2367	1.3889	7.7092	8.3655	0.0837	16.9774	11.8976	1.135	0.673		0.4062	-0.171032	97.7022
WCB132PX61	52.5862	0.2857	2.6567	4.6308	0.1503	15.8483	22.6985	0.3798	0.0151		0.493	-0.207579	99.5368
WCB132PX62	53.68	0.1343	1.559	4.4412	0.1324	16.2621	23.3651	0.2018	0.0022		0.0001	-4.21053e-05	99.7782
WCB132PX63	54.9039	0.1356	1.4534	15.1094	0.2408	28.323	0.5581	0.0157	0		0.0001	-4.21053e-05	100.74
WCB132PX64	54.0117	0.1543	1.5607	5.1782	0.141	18.7182	20.4686	0.1739	0		0.0952	-0.0400842	100.462
WCB132PX65	54.5859	0.1013	1.7753	16.4488	0.2972	27.3407	0.8024	0.0322	0.0106		0.2082	-0.0876632	101.515
WCB132PX81	56.0543	0.0941	0.6985	13.3244	0.2207	30.0502	0.2942	0.0013	0.0027		0.4577	-0.192716	101.005
WCB132PX82	53.6283	0.1973	1.6232	4.1709	0.1164	16.5888	23.475	0.1762	0.0033		0.6138	-0.258442	100.335
WCB132PX51	53.7554	0.1044	1.2673	6.2141	0.144	17.4722	20.9312	0.2859	0		0.0948	-0.0399158	100.229
WCB132PX52	54.3896	0.1271	1.5235	5.2539	0.142	17.0802	21.3312	0.2828	0.0018		0.0001	-4.21053e-05	100.132
WCB132PX41	53.7661	0.1477	1.5521	4.879	0.1569	16.7901	21.8163	0.2497	0.0039		0.4158	-0.175074	99.6025
WCB132PX42	53.6281	0.1009	1.5403	5.0999	0.145	17.2672	21.1964	0.2721	0		0.2337	-0.0984	99.3852
WCB132PX43	53.7897	0.182	1.6265	8.0814	0.1638	19.1464	16.6948	0.1861	0.0058		0.2538	-0.106863	100.023
WCB132PX91	54.645	0.2163	2.0511	15.7943	0.2411	27.4976	0.8508	0.0281	0.0041		0.1746	-0.0735158	101.429
WCB132PX92	53.9924	0.1281	1.6238	5.2347	0.1508	18.5872	19.8865	0.2044	0		0.1581	-0.0665684	99.8994
WCB132PX31	54.0861	0.1647	0.9935	5.7519	0.1216	16.4291	22.5592	0.214	0		0.3299	-0.138905	100.511
WCB132PX32	53.6561	0.1959	2.2806	5.7881	0.1565	16.7543	21.7497	0.2843	0.0075		0.1378	-0.0580211	100.953
WCB132PX71	55.2524	0.101	0.7596	17.2004	0.3204	27.0713	0.5249	0.0073	0		0.0605	-0.0254737	101.272
WCB132PX72	55.1674	0.1457	0.6783	17.0414	0.3349	26.9945	0.9411	0.0128	0		0.1214	-0.0511158	101.386
WCB132PX21	53.6994	0.2043	1.5514	4.5057	0.1364	16.5601	23.1345	0.2784	0.0004		0.0216	-0.00909474	100.083
WCB132PX22	53.8915	0.1837	1.2283	5.8634	0.1306	16.1135	22.5947	0.2885	0		0.1279	-0.0538526	100.368
WCB132PX11	53.9066	0.126	1.906	4.8546	0.1184	16.1724	22.9805	0.3275	0.0124		0.0753	-0.0317053	100.448
WCB132PX12	53.8661	0.273	1.343	5.8071	0.1425	16.1716	22.65	0.2839	0		0.0748	-0.0314947	100.581
Sample	SiO2	TiO2	Al2O3	FeO*	MnO	MgO	CaO	Na2O	K2O	Cr2O3	F	Cl	Total
Lower zone
WCB5209-A3-31	47.078	1.501	8.86	14.848	0.219	12.903	11.401	1.192	0.681	0.039	0.014	0.04	98.761
WCB5209-A4-47	45.991	1.742	9.823	15.499	0.201	11.91	11.52	1.238	1.002	0.056	0.077	0.078	99.087
WCB5209-A5-58	45.339	1.911	10.465	15.193	0.196	11.791	12.067	1.331	1.023	0.063	0.021	0.042	99.424
WCB5209-A7-79	44.289	2.357	11.424	15.156	0.171	11.14	11.861	1.409	1.176	0.038	0.028	0.053	99.078
WCB5209-A8-85	47.948	1.169	8.452	14.649	0.198	13.068	11.813	1.025	0.624	0.024	0.025	0.012	98.993
WCB5209-A9-94	44.881	2.2	10.485	15.617	0.231	11.22	11.636	1.353	1.064	0.047	0	0.059	98.78
WCB5209PX11	51.814	0.327	3.537	6.528	17.126	0.231	19.602	0.167	0.009	0.332			99.673
WCB5209PX12	52.771	0.239	2.467	7.533	17.527	0.226	18.394	0.175	0.001	0.311			99.644
WCB5209PX13	50.903	0.592	5.626	9.617	16.078	0.163	12.826	0.622	0.176	0.281			96.884
WCB5209PX21	52.952	0.234	2.002	6.715	17.215	0.223	19.182	0.164	0	0.25			98.937
WCB5209PX22	52.567	0.271	1.575	9.842	15.447	0.264	18.901	0.205	0.009	0.094			99.175
WCB5209PX23	52.106	0.325	3.234	6.757	16.562	0.197	19.701	0.184	0	0.169			99.235
WCB5209PX24	53.244	0.215	1.998	6.223	17.234	0.234	20.225	0.146	0	0.189			99.708
WCB5209PX-25	51.942	0.361	2.983	7.69	16.412	0.179	18.903	0.217	0	0.156			98.843
WCB5209PX26	52.297	0.278	1.702	8.063	14.352	0.248	21.777	0.226	0	0.185			99.128
WCB5209PX41	53.23	0.223	1.876	10.803	18.725	0.319	14.546	0.146	0.013	0.22			100.101
WCB5209PX42	52.438	0.229	1.712	7.842	16.935	0.273	18.565	0.153	0	0.111			98.258
WCB5209PX43	51.222	0.355	3.095	6.996	14.722	0.247	20.859	0.442	0	0.197			98.135
WCB5209PX46	51.576	0.415	3.488	9.797	16.773	0.233	16.053	0.361	0	0.357			99.053
WCB5209PX51	53.84	0.068	1.44	3.624	17.91	0.112	21.428	0.155	0	0.605			99.182
WCB5209PX52	51.744	0.286	2.119	8.615	13.832	0.256	20.975	0.28	0.027	0.183			98.317
WCB5209PX55	52.027	0.197	2.277	7.724	14.001	0.291	21.436	0.484	0.051	0.284			98.772
WCB5209PX59	46.602	1.377	8.243	14.216	12.739	0.177	11.259	1.048	0.645	0.012			96.318
WCB5209PX71	52.354	0.221	2.559	5.583	16.937	0.193	19.99	0.225	0.001	0.831			98.894
WCB5209PX72	51.516	0.369	3.114	6.817	15.961	0.24	20.373	0.255	0.002	0.181			98.828
WCB5209PX73	52.724	0.23	2.335	10.462	16.541	0.284	16.352	0.286	0.005	0.212			99.431
WCB5209PX74	51.699	0.281	2.628	5.485	15.112	0.232	22.651	0.245	0	0.279			98.612
WCB5209PX75	51.979	0.285	2.517	7.812	14.384	0.256	20.268	0.33	0.031	0.171			98.033
WCB5209PX77	52.79	0.234	1.772	7.934	16.092	0.209	19.895	0.233	0	0.101			99.26
WCB5209PX78	52.587	0.25	1.71	7.78	14.582	0.287	20.617	0.244	0.015	0.13			98.202
WCB5209PX82	51.952	0.368	2.591	8.393	16.131	0.275	19.005	0.23	0	0.159			99.104
WCB5209PX93	52.182	0.285	2.374	8.689	15.433	0.258	19.152	0.349	0.016	0.275			99.013
WCB5209PX121	53.373	0.136	1.917	4.058	17.664	0.128	21.599	0.192	0.01	0.462			99.539
WCB5209PX131	53.159	0.119	1.965	4.196	16.265	0.164	22.841	0.217	0	0.463			99.389
WCB5209PX132	51.387	0.288	4.038	6.813	15.253	0.205	20.198	0.394	0.001	0.275			98.852
WCB5209PX133	52.743	0.151	1.358	8.384	14.032	0.289	22.126	0.251	0	0.159			99.493
WCB6809-A13	47.393	1.491	8.902	15.728	0.285	12.086	11.592	1.178	0.872	0.06	0.094	0.081	99.704
WCB6809-A14	46.371	1.343	9.421	16.171	0.271	12.028	11.605	1.211	0.844	0.049	0.014	0.094	99.395
WCB6809-A22	50.294	0.638	7.062	15.236	0.243	13.42	11.944	0.82	0.502	0.056	0	0.067	100.267
WCB6809-A53	49	0.568	6.193	14.873	0.299	13.804	11.556	0.715	0.408	0.063	0.045	0.024	97.524
WCB6809-A54	45.763	1.456	9.291	16.138	0.235	11.828	11.656	1.243	0.906	0.061	0.059	0.087	98.678
WCB6809-A55	46.528	0.882	7.887	15.847	0.258	12.816	11.218	0.935	0.642	0.017	0.014	0.079	97.099
WCB6809-A63	45.548	1.616	9.095	15.969	0.262	12.127	11.507	1.25	0.868	0.049	0.073	0.109	98.417
WCB6809-A64	46.964	1.495	8.717	15.634	0.24	12.456	11.713	1.174	0.808	0.043	0.049	0.09	99.342
WCB6809-A65	47.065	1.615	8.907	16.042	0.234	12.397	11.571	1.236	0.793	0.079	0.01	0.091	100.015
WCB6809-A66	44.679	1.514	9.423	15.818	0.231	12.07	11.461	1.217	0.867	0.013	0.076	0.072	97.393
WCB6809-A712	46.164	1.505	9.618	16.184	0.252	11.801	11.664	1.174	0.957	0.065	0.08	0.121	99.524
WCB6809-A713	45.078	1.514	9.796	16.413	0.314	11.607	11.676	1.232	1.088	0.04	0	0.14	98.866
WCB6809-A714	45.657	1.394	9.9	16.48	0.328	11.519	11.672	1.257	0.965	0.039	0.031	0.114	99.317
WCB6809-A74	47.138	1.755	8.283	14.231	0.156	13.165	11.905	1.243	0.818	0.159	0.07	0.093	98.966
WCB6809-A75	47.792	0.559	6.773	13.916	0.206	14.402	11.898	0.843	0.476	0.068	0	0.02	96.948
WCB6809-A95	44.047	1.483	9.082	15.857	0.227	12.259	11.618	1.234	0.971	0.052	0.003	0.099	96.909
WCB6809-A96	44.466	1.421	9.155	16.107	0.28	12.331	11.385	1.327	0.892	0.007	0.09	0.117	97.514
WCB6809-A97	43.894	1.646	8.814	15.903	0.29	11.966	11.385	1.281	0.801	0.052	0.031	0.11	96.135
WCB6809-A98	46.312	0.991	8.581	15.93	0.31	12.394	11.492	1.128	0.778	0.014	0	0.076	97.989
WCB6809-A103	52.04	0.49	4.696	14.427	0.276	14.765	11.778	0.575	0.292	0.087	0.077	0.056	99.514
WCB6809-A105	46.327	1.485	9.275	15.681	0.207	12.576	11.503	1.311	0.907	0.029	0.028	0.117	99.408
WCB6809-A106	45.351	1.514	9.363	16.351	0.293	11.969	11.395	1.243	0.926	0.055	0	0.078	98.52
WCB6809-A123	49.98	0.536	4.739	14.435	0.288	14.741	11.511	0.581	0.301	0.05	0.011	0.049	97.206
WCB6809-A124	46.002	1.252	8.79	15.924	0.278	12.165	11.761	1.085	0.771	0.058	0.077	0.06	98.177
WCB6809-A135	45.825	1.84	9.259	16.047	0.261	12.142	11.405	1.362	0.904	0.061	0.038	0.078	99.188
WCB6809-A136	45.498	0.929	8.296	15.735	0.228	12.592	11.583	1.045	0.757	0	0.073	0.071	96.76
WCB6809PX12	52.57	0.166	1.172	9.981	13.283	0.299	22.031	0.27	0	0.041			99.813
WCB6809PX21	51.629	0.192	1.27	10.92	13.118	0.378	21.03	0.225	0	0.073			98.835
WCB6809PX52	51.649	0.406	1.98	11.093	13.971	0.343	19.215	0.256	0.012	0.073			98.998
WCB6809PX62	52.433	0.192	1.392	10.705	13.258	0.412	20.438	0.316	0.019	0.058			99.223
WCB6809PX71	52.191	0.262	2.105	9.714	13.564	0.273	19.836	0.396	0.111	0.079			98.531
WCB6809PX73	51.694	0.262	1.615	12.265	14.686	0.389	17.48	0.236	0.026	0.122			98.775
WCB6809PX76	51.293	0.466	2.065	9.745	14.108	0.274	20.172	0.233	0.008	0.147			98.511
WCB6809PX77	51.777	0.29	1.618	11.413	13.305	0.372	20.001	0.316	0.011	0.017			99.12
WCB6809PX78	51.733	0.275	1.6	10.293	12.697	0.391	21.654	0.346	0	0.058			99.047
WCB6809PX91	50.717	2.131	1.577	11.149	13.66	0.273	20.111	0.286	0.005	0.071			99.98
WCB6809PX92	51.249	0.413	1.954	9.668	13.304	0.334	21.511	0.304	0.001	0.068			98.806
WCB6809PX93	52.38	0.143	1.23	11.252	13.437	0.378	20.717	0.295	0	0.04			99.872
WCB6809PX94	48.772	0.457	6.86	15.096	13.57	0.361	11.017	0.873	0.456	0.057			97.519
WCB6809PX101	52.367	0.229	1.36	8.552	14.139	0.302	21.485	0.286	0	0.244			98.964
WCB6809PX102	51.901	0.185	1.32	11.4	13.081	0.529	20.175	0.321	0.014	0.488			99.414
WCB6809PX121	51.522	0.286	1.794	8.558	13.596	0.262	22.151	0.274	0	0.076			98.519
WCB6809PX122	51.985	0.157	1.285	9.717	13.249	0.38	21.56	0.301	0	0.023			98.657
WCB6809PX131	52.294	0.232	2.045	8.771	14.345	0.219	20.945	0.356	0.01	0.196			99.413
WCB6809PX132	52.701	0.147	1.649	8.218	14.843	0.284	21.043	0.317	0	0.506			99.708
WCB6809PX133	52.09	0.116	1.815	6.943	14.26	0.243	21.945	0.362	0	0.757			98.531
WCB6809PX134	52.507	0.187	1.319	10.468	13.115	0.45	21.845	0.305	0.001	0.02			100.217
Western selvage
MMB594PX11	51.693	0.474	2.893	6.898	15.024	0.223	21.812	0.289	0.014	0.085			99.405
MMB594PX12	52.293	0.249	2.197	6.846	15.212	0.255	22.169	0.27	0.002	0.097			99.59
MMB594PX13	52.322	0.28	1.874	7.719	14.447	0.248	22.541	0.292	0	0.055			99.778
MMB594PX14	51.095	0.288	2.673	11.688	14.091	0.344	19.517	0.318	0.004	0.198			100.216
MMB594PX15	52.526	0.169	1.085	9.259	14.082	0.322	21.89	0.294	0.006	0.045			99.678
MMB594PX21	51.287	0.436	1.495	10.376	12.93	0.284	22.128	0.359	0	0.063			99.358
MMB594PX22	51.787	0.348	1.664	10.16	13.267	0.35	21.558	0.339	0.001	0.072			99.546
MMB594PX23	52.851	0.303	1.318	10.196	14.102	0.295	20.992	0.265	0	0.034			100.356
MMB594PX23'	51.824	0.321	1.696	10.05	13.165	0.349	21.782	0.359	0.003	0.029			99.578
MMB594PX24	51.152	0.442	1.777	9.3	13.58	0.303	21.797	0.344	0.009	0.103			98.807
MMB594PX25	52.12	0.197	1.067	9.544	13.631	0.31	21.798	0.331	0.001	0.026			99.025
MMB594PX31	51.642	0.278	1.454	12.268	15.739	0.363	16.653	0.231	0	0			98.628
MMB594PX32	52.063	0.361	1.926	9.12	13.689	0.235	21.955	0.338	0.002	0.202			99.891
MMB594PX33	51.251	0.388	1.587	13.453	15.28	0.395	15.984	0.265	0.003	0.028			98.634
MMB594PX34	51.779	0.416	1.792	9.538	13.562	0.336	21.615	0.334	0.003	0.067			99.442
MMB594PX41	51.49	0.385	2.117	9.596	13.485	0.31	21.438	0.336	0.004	0.102			99.263
MMB594PX42	52.843	0.183	0.951	10.143	13.868	0.307	21.172	0.284	0	0.002			99.753
MMB594PX53	51.493	0.463	2.215	9.598	13.561	0.312	21.735	0.315	0.006	0.163			99.861
MMB594PX61	52.385	0.286	1.929	6.648	14.991	0.248	22.481	0.267	0	0.216			99.451
MMB594PX62	52.188	0.151	1.71	5.435	15.936	0.161	22.745	0.204	0	0.349			98.879
MMB594PX63	52.785	0.17	1.533	7.809	14.789	0.241	21.993	0.322	0.006	0.358			100.006
MMB594PX64	52.903	0.136	1.761	9.495	17.753	0.172	16.964	0.174	0.005	0.31			99.673
MMB594PX65	52.512	0.093	1.7	9.613	16.068	0.258	18.762	0.244	0	0.331			99.581
MMB594PX81	53.253	0.234	1.596	8.074	16.466	0.201	20.183	0.229	0.01	0.145			100.391
MMB594PX82	52.152	0.366	2.113	11.429	16.471	0.308	16.719	0.222	0	0.177			99.957
MMB594PX83	51.873	0.454	1.776	9.799	13.536	0.37	21.694	0.309	0	0.032			99.843
MMB594PX84	51.157	0.453	1.984	10.178	13.548	0.326	20.878	0.344	0.007	0.064			98.939
MMB594PX85	51.782	0.372	1.819	10.232	13.371	0.361	21.66	0.35	0.021	0.027			99.995
MMB59PX86	52.325	0.154	1.979	8.848	14.875	0.26	20.765	0.291	0.003	0.325			99.825
MMB594PX87	52.73	0.193	2.166	6.378	16.092	0.134	21.236	0.36	0.027	0.376			99.692
MMB594PX91	52.3	0.34	1.539	9.688	14.218	0.303	21.481	0.27	0.007	0.047			100.193
MMB594PX92	51.565	0.308	1.542	17.493	16.449	0.504	11.954	0.19	0.004	0.074			100.083
MMB594PX93	51.252	0.427	1.95	10.357	13.597	0.34	21.07	0.319	0	0.047			99.359
MMB594PX96	51.865	0.314	2.332	9.646	13.469	0.287	21.804	0.376	0	0.279			100.372
MMB594PX97	51.852	0.401	2.119	10.16	13.571	0.344	21.699	0.404	0.001	0.292			100.843
